# Supplementary material
Source: Springer Nature journal article supplement (https://www.springermedizin.de/resource/supplementary/12872_2012_582_MOESM3_ESM.pdf/9430280)

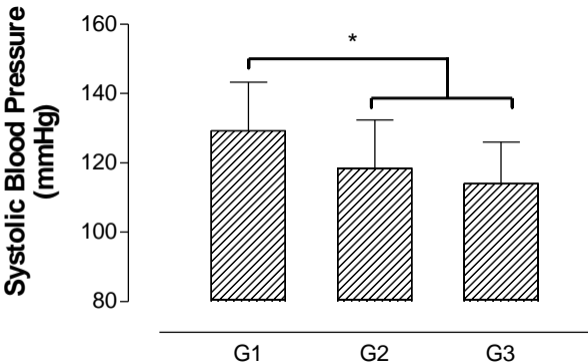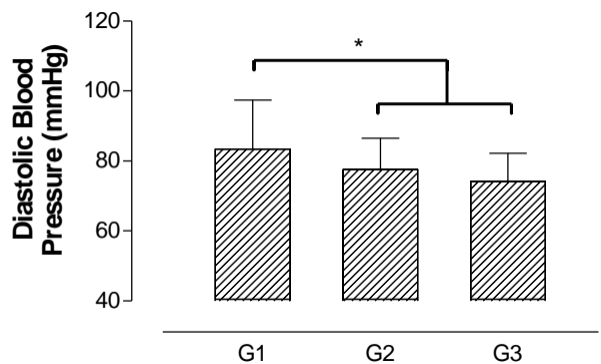

Supplement: MOESM3 [file 9430280]
